# Supplementary material for: Exploring the Potential of High-Molar-Activity Samarium-153 for Targeted Radionuclide Therapy with [153Sm]Sm-DOTA-TATE
Source: MDPI journal article supplement (doi:10.3390/pharmaceutics14122566), 2022-11-23
Supplement: s1 [file s1]

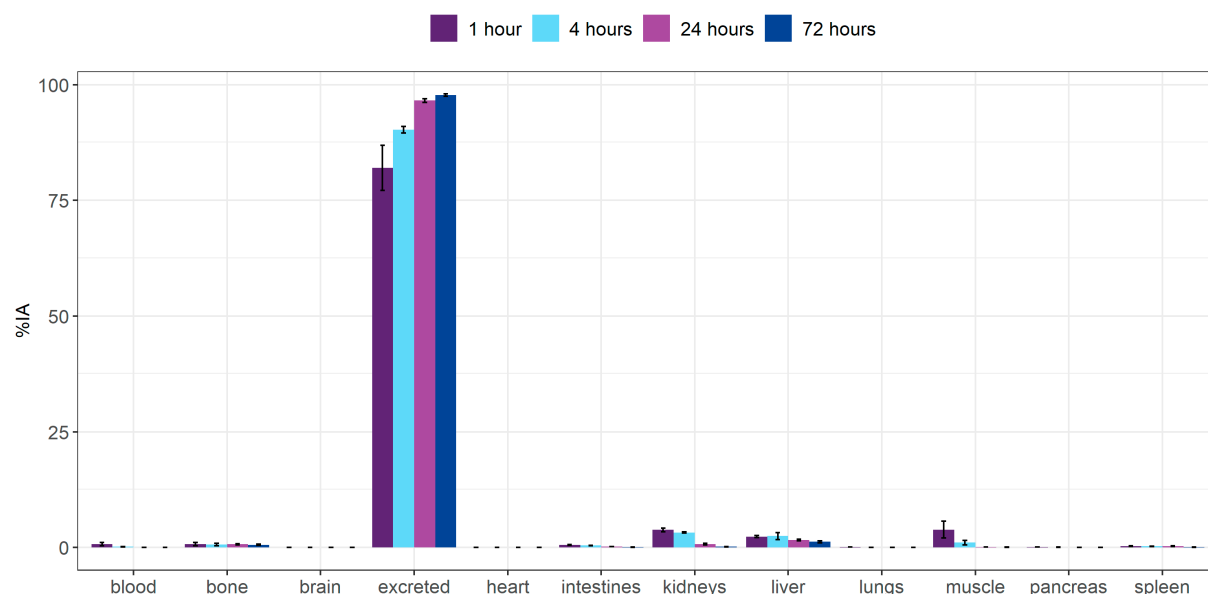

**Supplementary Figure S1.** Ex vivo biodistribution over time expressed as percentage of injected activity (%IA) of [ $^{153}\text{Sm}$ ]Sm-DOTA-TATE in BALB/c mice. Values represent mean  $\pm$  standard deviation ( $n = 3-4$ ).

**Supplementary Table S1.** Biodistribution data expressed as percentage of injected activity (%IA)\* of [ $^{153}\text{Sm}$ ]Sm-DOTA-TATE in male BALB/c mice. Values represent mean  $\pm$  standard deviation ( $n = 3-4$ ).

|            | %IA            |                |                |                |
|------------|----------------|----------------|----------------|----------------|
|            | 1 h            | 4 h            | 24 h           | 72 h           |
| Blood      | 0.7 $\pm$ 0.3  | 0.2 $\pm$ 0.0  | 0.0 $\pm$ 0.0  | 0.0 $\pm$ 0.0  |
| Bone       | 0.8 $\pm$ 0.4  | 0.6 $\pm$ 0.2  | 0.7 $\pm$ 0.1  | 0.6 $\pm$ 0.1  |
| Brain      | 0.0 $\pm$ 0.0  | 0.0 $\pm$ 0.0  | 0.0 $\pm$ 0.0  | 0.0 $\pm$ 0.0  |
| Excreted   | 82.0 $\pm$ 4.8 | 90.2 $\pm$ 0.7 | 96.6 $\pm$ 0.4 | 97.8 $\pm$ 0.2 |
| Heart      | 0.0 $\pm$ 0.0  | 0.0 $\pm$ 0.0  | 0.0 $\pm$ 0.0  | 0.0 $\pm$ 0.0  |
| Intestines | 0.6 $\pm$ 0.1  | 0.5 $\pm$ 0.0  | 0.2 $\pm$ 0.0  | 0.1 $\pm$ 0.0  |
| Kidneys    | 3.8 $\pm$ 0.4  | 3.2 $\pm$ 0.1  | 0.7 $\pm$ 0.2  | 0.2 $\pm$ 0.0  |
| Liver      | 2.34 $\pm$ 0.2 | 2.5 $\pm$ 0.8  | 1.6 $\pm$ 0.2  | 1.2 $\pm$ 0.2  |
| Lungs      | 0.1 $\pm$ 0.0  | 0.0 $\pm$ 0.0  | 0.0 $\pm$ 0.0  | 0.0 $\pm$ 0.0  |
| Muscle     | 3.8 $\pm$ 1.8  | 1.1 $\pm$ 0.5  | 0.1 $\pm$ 0.0  | 0.1 $\pm$ 0.0  |
| Pancreas   | 0.1 $\pm$ 0.0  | 0.1 $\pm$ 0.0  | 0.0 $\pm$ 0.0  | 0.0 $\pm$ 0.0  |
| Spleen     | 0.3 $\pm$ 0.1  | 0.3 $\pm$ 0.0  | 0.3 $\pm$ 0.1  | 0.1 $\pm$ 0.0  |
| Stomach    | 0.2 $\pm$ 0.0  | 0.1 $\pm$ 0.1  | 0.0 $\pm$ 0.0  | 0.0 $\pm$ 0.0  |

\* Percentage of injected activity calculated as (cpm in organ/total cpm)  $\times$  100

**Supplementary Table S2.** Biodistribution data expressed as standard uptake value (SUV)\* of [<sup>153</sup>Sm]Sm-DOTA-TATE in male BALB/c mice. Values represent mean ± standard deviation (n = 3-4).

|          | SUV       |           |           |           |
|----------|-----------|-----------|-----------|-----------|
|          | 1 h       | 4 h       | 24 h      | 72 h      |
| Blood    | 0.1 ± 0.0 | 0.0 ± 0.0 | 0.0 ± 0.0 | 0.0 ± 0.0 |
| Bone     | 0.1 ± 0.0 | 0.1 ± 0.0 | 0.1 ± 0.0 | 0.1 ± 0.0 |
| Brain    | 0.0 ± 0.0 | 0.0 ± 0.0 | 0.0 ± 0.0 | 0.0 ± 0.0 |
| Heart    | 0.1 ± 0.0 | 0.0 ± 0.0 | 0.0 ± 0.0 | 0.0 ± 0.0 |
| Kidneys  | 2.1 ± 0.2 | 1.8 ± 0.1 | 0.4 ± 0.1 | 0.1 ± 0.0 |
| Liver    | 0.4 ± 0.1 | 0.5 ± 0.2 | 0.3 ± 0.0 | 0.2 ± 0.0 |
| Lungs    | 0.2 ± 0.0 | 0.1 ± 0.0 | 0.0 ± 0.0 | 0.0 ± 0.0 |
| Muscle   | 0.6 ± 0.3 | 0.2 ± 0.1 | 0.0 ± 0.0 | 0.0 ± 0.0 |
| Pancreas | 0.2 ± 0.0 | 0.1 ± 0.0 | 0.0 ± 0.0 | 0.0 ± 0.0 |
| Spleen   | 0.8 ± 0.2 | 0.8 ± 0.2 | 0.9 ± 0.3 | 0.3 ± 0.1 |

SUV = Standardized uptake value. Calculated as (radioactivity in cpm in organ/weight of organ in grams) / total cpm recovered/body weight).

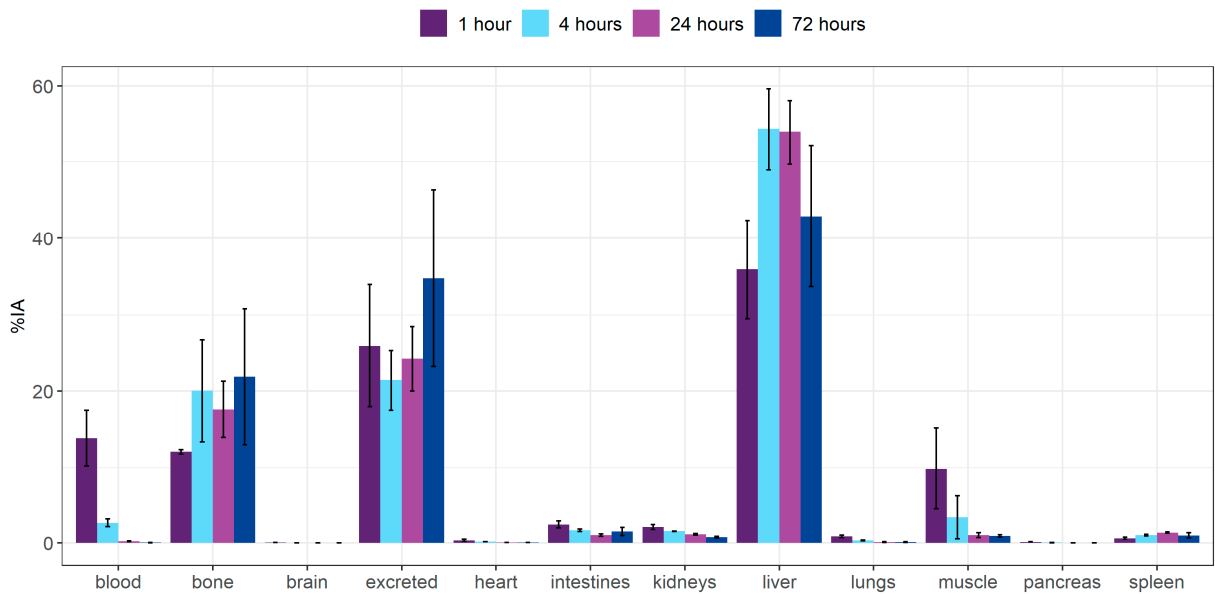

**Supplementary Figure S2.** Ex vivo biodistribution over time expressed as percentage of injected activity (%IA) of [<sup>153</sup>Sm]SmCl<sub>3</sub> in BALB/c mice. Values represent mean ± standard deviation (n = 3-4).

**Supplementary Table S3:** Biodistribution data time expressed as percentage of injected activity (%IA)\* of [<sup>153</sup>Sm]SmCl<sub>3</sub> in male BALB/c mice. Values represent mean ± standard deviation (*n* = 3-4).

|            | %IA        |            |            |             |
|------------|------------|------------|------------|-------------|
|            | 1 h        | 4 h        | 24 h       | 72 h        |
| Blood      | 13.8 ± 3.6 | 2.7 ± 0.5  | 0.2 ± 0.0  | 0.0 ± 0.0   |
| Bone       | 12.1 ± 0.3 | 20.1 ± 6.7 | 17.6 ± 3.7 | 21.9 ± 8.9  |
| Brain      | 0.1 ± 0.0  | 0.0 ± 0.0  | 0.0 ± 0.0  | 0.0 ± 0.0   |
| Excreted   | 26.0 ± 8.0 | 21.4 ± 3.9 | 24.2 ± 4.2 | 34.8 ± 11.6 |
| Heart      | 0.4 ± 0.1  | 0.2 ± 0.0  | 0.1 ± 0.0  | 0.1 ± 0.0   |
| Intestines | 2.4 ± 0.5  | 1.7 ± 0.2  | 1.0 ± 0.2  | 1.5 ± 0.5   |
| Kidneys    | 2.1 ± 0.3  | 1.6 ± 0.0  | 1.1 ± 0.1  | 0.8 ± 0.1   |
| Liver      | 35.9 ± 6.4 | 54.3 ± 5.3 | 53.9 ± 4.2 | 42.9 ± 9.2  |
| Lungs      | 0.9 ± 0.2  | 0.3 ± 0.0  | 0.1 ± 0.0  | 0.1 ± 0.0   |
| Muscle     | 9.8 ± 5.3  | 3.4 ± 2.8  | 1.0 ± 0.3  | 0.9 ± 0.2   |
| Pancreas   | 0.1 ± 0.0  | 0.0 ± 0.0  | 0.0 ± 0.0  | 0.0 ± 0.0   |
| Spleen     | 0.6 ± 0.1  | 1.0 ± 0.1  | 1.4 ± 0.1  | 1.0 ± 0.3   |
| Stomach    | 0.5 ± 0.2  | 0.2 ± 0.0  | 0.2 ± 0.2  | 0.2 ± 0.1   |

\* Percentage of injected activity calculated as (cpm in organ/total cpm) × 100.

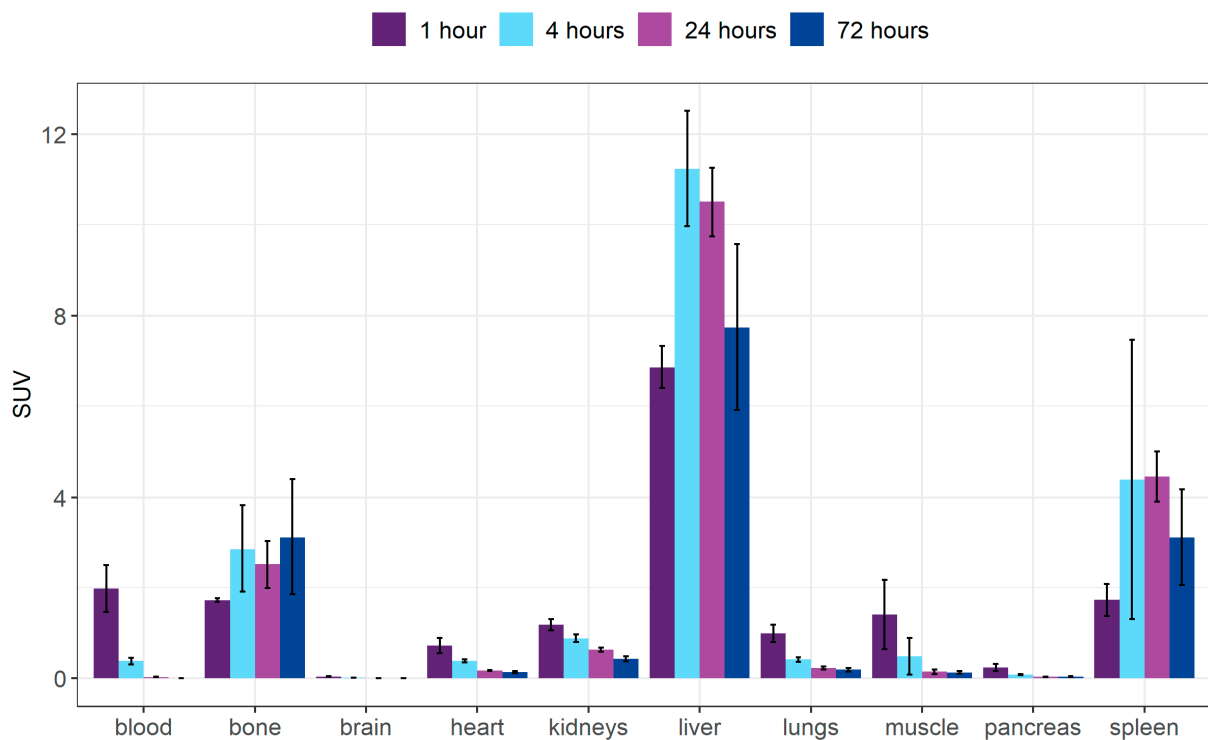

**Supplementary Figure S3.** Ex vivo biodistribution over time expressed as standard uptake value (SUV) of [<sup>153</sup>Sm]SmCl<sub>3</sub> in BALB/c mice. Values represent mean ± standard deviation (*n* = 3-4).

**Supplementary Table S4:** Biodistribution data expressed as standard uptake value (SUV)\* of [<sup>153</sup>Sm]SmCl<sub>3</sub> in male BALB/c mice. Values represent mean ± standard deviation (n = 3-4).

|          | SUV       |            |            |           |
|----------|-----------|------------|------------|-----------|
|          | 1 h       | 4 h        | 24 h       | 72 h      |
| Blood    | 2.0 ± 0.5 | 0.4 ± 0.1  | 0.0 ± 0.0  | 0.0 ± 0.0 |
| Bone     | 1.7 ± 0.0 | 2.9 ± 1.0  | 2.5 ± 0.5  | 3.1 ± 1.3 |
| Brain    | 0.0 ± 0.0 | 0.0 ± 0.0  | 0.0 ± 0.0  | 0.0 ± 0.0 |
| Heart    | 0.7 ± 0.2 | 0.4 ± 0.0  | 0.2 ± 0.0  | 0.1 ± 0.0 |
| Kidneys  | 1.2 ± 0.1 | 0.9 ± 0.1  | 0.6 ± 0.0  | 0.4 ± 0.0 |
| Liver    | 6.9 ± 0.5 | 11.2 ± 1.3 | 10.5 ± 0.8 | 7.7 ± 1.8 |
| Lungs    | 1.0 ± 0.2 | 0.4 ± 0.0  | 0.2 ± 0.0  | 0.2 ± 0.0 |
| Muscle   | 1.4 ± 0.8 | 0.5 ± 0.4  | 0.1 ± 0.0  | 0.1 ± 0.0 |
| Pancreas | 0.2 ± 0.1 | 0.1 ± 0.0  | 0.0 ± 0.0  | 0.0 ± 0.0 |
| Spleen   | 1.7 ± 0.4 | 4.4 ± 3.1  | 4.4 ± 0.6  | 3.1 ± 1.1 |

\* SUV = Standardized uptake value. Calculated as (radioactivity in cpm in organ/weight of organ in grams) / total cpm recovered/body weight).

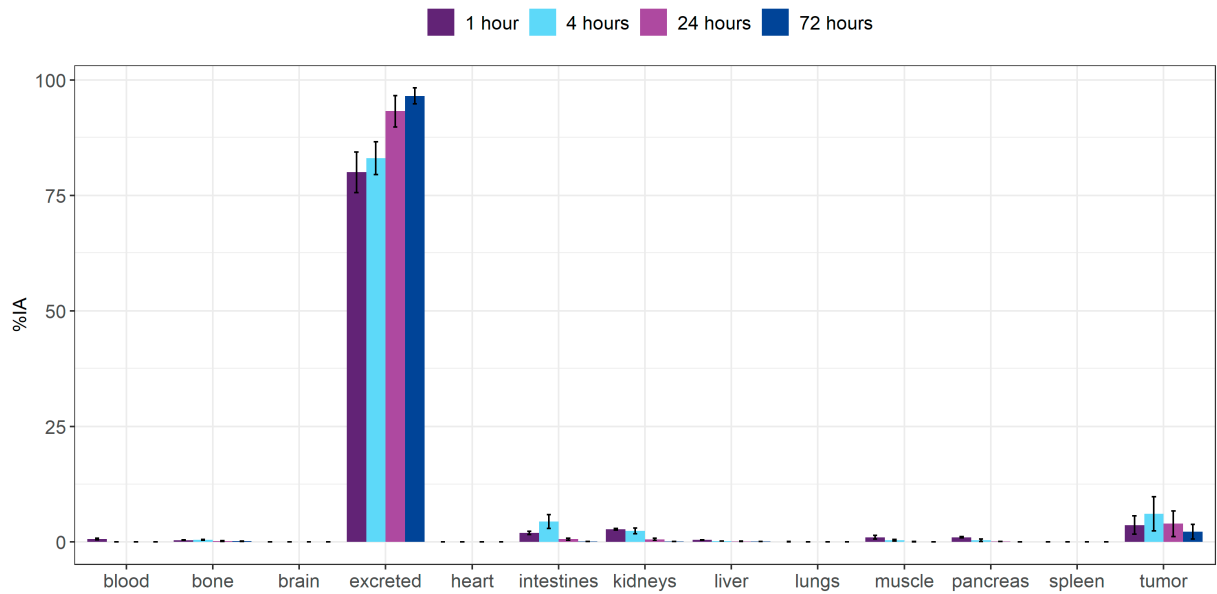

**Supplementary Figure S4.** Ex vivo biodistribution over time expressed as percentage of injected activity (%IA) of [<sup>153</sup>Sm]Sm-DOTA-TATE in CA20948 xenograft mice. Values represent mean ± standard deviation (n = 3-4).

**Supplementary Table S5:** Biodistribution data expressed as percentage of injected activity (%IA)\* of [<sup>153</sup>Sm]Sm-DOTA-TATE in CA20498 tumor bearing male NMRI-nude mice. Values represent mean ± standard deviation (*n* = 3-4).

|            | %ID        |            |            |            |
|------------|------------|------------|------------|------------|
|            | 1 h        | 4 h        | 24 h       | 72 h       |
| Blood      | 0.7 ± 0.2  | 0.1 ± 0.0  | 0.0 ± 0.0  | 0.0 ± 0.0  |
| Bone       | 0.4 ± 0.0  | 0.5 ± 0.1  | 0.2 ± 0.1  | 0.2 ± 0.0  |
| Brain      | 0.0 ± 0.0  | 0.0 ± 0.0  | 0.0 ± 0.0  | 0.0 ± 0.0  |
| Excreted   | 80.0 ± 4.4 | 83.0 ± 3.5 | 94.1 ± 3.6 | 96.6 ± 1.7 |
| Heart      | 0.0 ± 0.0  | 0.0 ± 0.0  | 0.0 ± 0.0  | 0.0 ± 0.0  |
| Intestines | 2.0 ± 0.3  | 4.4 ± 1.5  | 0.6 ± 0.2  | 0.1 ± 0.0  |
| Kidneys    | 2.8 ± 0.2  | 2.4 ± 0.6  | 0.5 ± 0.2  | 0.1 ± 0.0  |
| Liver      | 0.4 ± 0.1  | 0.2 ± 0.0  | 0.1 ± 0.0  | 0.2 ± 0.0  |
| Lungs      | 0.1 ± 0.0  | 0.0 ± 0.0  | 0.0 ± 0.0  | 0.0 ± 0.0  |
| Muscle     | 1.0 ± 0.4  | 0.4 ± 0.2  | 0.1 ± 0.0  | 0.0 ± 0.0  |
| Pancreas   | 1.0 ± 0.1  | 0.4 ± 0.3  | 0.1 ± 0.0  | 0.0 ± 0.0  |
| Spleen     | 0.0 ± 0.0  | 0.0 ± 0.0  | 0.0 ± 0.0  | 0.0 ± 0.0  |
| Stomach    | 0.7 ± 0.1  | 1.0 ± 0.3  | 0.3 ± 0.2  | 0.1 ± 0.0  |
| Tumor      | 3.7 ± 2.0  | 6.1 ± 3.7  | 3.2 ± 2.9  | 2.2 ± 1.6  |

\* Percentage of injected activity calculated as (cpm in organ/total cpm) × 100

**Supplementary Table S6:** Biodistribution data expressed as standard uptake value (SUV)\* of [<sup>153</sup>Sm]Sm-DOTA-TATE in CA20498 tumor bearing male NMRI-nude mice. Values represent mean ± standard deviation (*n* = 3-4).

|          | SUV       |           |           |           |
|----------|-----------|-----------|-----------|-----------|
|          | 1 h       | 4 h       | 24 h      | 72 h      |
| Blood    | 0.1 ± 0.0 | 0.0 ± 0.0 | 0.0 ± 0.0 | 0.0 ± 0.0 |
| Bone     | 0.1 ± 0.0 | 0.1 ± 0.0 | 0.0 ± 0.0 | 0.0 ± 0.0 |
| Brain    | 0.0 ± 0.0 | 0.0 ± 0.0 | 0.0 ± 0.0 | 0.0 ± 0.0 |
| Heart    | 0.0 ± 0.0 | 0.0 ± 0.0 | 0.0 ± 0.0 | 0.0 ± 0.0 |
| Kidneys  | 1.8 ± 0.1 | 1.7 ± 0.3 | 0.3 ± 0.1 | 0.1 ± 0.0 |
| Liver    | 0.1 ± 0.0 | 0.0 ± 0.0 | 0.0 ± 0.0 | 0.0 ± 0.0 |
| Lungs    | 0.1 ± 0.0 | 0.0 ± 0.0 | 0.0 ± 0.0 | 0.0 ± 0.0 |
| Muscle   | 0.2 ± 0.1 | 0.1 ± 0.0 | 0.0 ± 0.0 | 0.0 ± 0.0 |
| Pancreas | 1.2 ± 0.2 | 0.6 ± 0.4 | 0.1 ± 0.0 | 0.0 ± 0.0 |
| Spleen   | 0.1 ± 0.0 | 0.1 ± 0.0 | 0.0 ± 0.0 | 0.0 ± 0.0 |
| Tumor    | 4.5 ± 2.0 | 4.4 ± 1.1 | 1.9 ± 1.2 | 1.7 ± 1.0 |

\* SUV = Standardized uptake value. Calculated as (radioactivity in cpm in organ/weight of organ in grams) / total cpm recovered/body weight).
